# Supplementary material for: A fluorescence “turn-on” probe for the detection of HSO3− based on a pyrene-functionalized mesoporous silica material
Source: Royal Society of Chemistry journal article supplement (doi:10.1039/d3nj01095c), 2023-01-01
Supplement: d3nj01095c1.pdf [file d3nj01095c1.pdf]

## Fluorescence “turn-on” probe for the detection of $\text{HSO}_3^-$ based on pyrene-functionalized mesoporous silica material

Xinyue Zhao,<sup>a#</sup> Qian Zhao,<sup>a#</sup> Yating Lu,<sup>a</sup> Wen Xu,<sup>a</sup> and Jing Wang<sup>ab\*</sup>

<sup>a</sup>School of Chemistry and Chemical Engineering, Guangxi University, Nanning 530004, PR China. <sup>b</sup>Guangxi Colleges and Universities Key Laboratory of Applied Chemistry Technology and Resource Development

<sup>#</sup>These authors contributed equally to this work.

E-mail: [wjwyj82@gxu.edu.cn](mailto:wjwyj82@gxu.edu.cn) (J. Wang)

**Table S1** Surface area, pore volume and pore diameter of SBA-15 and PYA-SBA-15

| Sample                | SBET <sup>a</sup> (m <sup>2</sup> ·g <sup>-1</sup> ) | V <sub>p</sub> <sup>b</sup> (cm <sup>3</sup> ·g <sup>-1</sup> ) | D <sub>p</sub> <sup>c</sup> (nm) |
|-----------------------|------------------------------------------------------|-----------------------------------------------------------------|----------------------------------|
| SBA-15 <sup>[1]</sup> | 486                                                  | 1.24                                                            | 10.20                            |
| PYA-SBA-15            | 287                                                  | 0.64                                                            | 9.72                             |

<sup>a</sup> the BET surface area, <sup>b</sup> the average pore diameter, <sup>c</sup> the total pore volume

**Table S2** The performance comparison of PYA-SBA-15 with recently reported nanomaterial- based methods for the detection of  $\text{HSO}_3^-$

| Material                    | LOD (μmol/L) | Detection media           | Detection mode | Ref.      |
|-----------------------------|--------------|---------------------------|----------------|-----------|
| PYA-SBA-15                  | 7.60         | Aqueous solution          | Turn on        | This work |
| NI                          | 2.05         | DMF:H <sub>2</sub> O=3:7  | Turn on        | [2]       |
| Probe 1                     | 3.21         | DMSO:H <sub>2</sub> O=1:1 | Ratiometric    | [3]       |
| MITO-TPE                    | 27.22        | DMSO                      | Turn on        | [4]       |
| Cou-F                       | 0.65         | DMSO                      | Turn on        | [5]       |
| Au NCs                      | 12.0         | Aqueous solution          | Turn on        | [6]       |
| Ir1@MSNs-NH <sub>2</sub>    | 0.80         | DMSO:H <sub>2</sub> O=1:5 | Turn on        | [7]       |
| QNP                         | 2.10         | 2% DMSO                   | Turn off       | [8]       |
| Dual-site fluorescent probe | 5.53         | DMSO                      | Turn off       | [9]       |

### References

- [1] Huang J, Wang J, Li D, et al., Terthiophene-functionalized mesoporous silica-based fluorescence sensor for the detection of trace methyl orange in aqueous media. **Microchimica Acta** 2021, 188 (12), 410
- [2] Wang Y, Zhou F, Meng Q, et al., A novel fluorescence probe for the reversible detection of bisulfite and hydrogen peroxide pair in vitro and in vivo. **Chemistry-An Asian Journal** 2021, 16 (21), 3419-3426.
- [3] Mu X., Zhu, J., Yan, L., Tang, N., A ratiometric fluorescent probe for the rapid and specific detection of HSO<sup>-</sup> 3 in water samples. **Luminescence** 2021, 36 (4), 923-927.
- [4] Yang X, Tang J, Zhang D, et al., An AIE probe for imaging mitochondrial SO<sub>2</sub>- induced stress and SO<sub>2</sub> levels during heat stroke. **Chemical Communications** 2020, 56 (86), 13217-13220.
- [5] Wang X, Li M, Duan T, et al., A dual responsive fluorescent probe for selective detection of cysteine and bisulfite and its application in bioimaging. **RSC Advances** 2021, 12 (2), 874-877.
- [6] Sachdev A, Raj R, Matai I, et al., Label-free fluorescence “turn-on” detection of SO<sub>2</sub>- 3 by gold nanoclusters: Integration in a hydrogel platform and intracellular detection. **Analytical Methods** 2019, 11 (9), 1214-1223.
- [7] Li X, Zeng R, Xie C, et al., Silica nanoparticles doped with a benzo[e]indolium-tethered iridium(iii) complex for reversible detection of HSO<sup>-</sup> 3 and Hg<sup>2+</sup>/Cu<sup>2+</sup> in water. **Dyes and Pigments** 2019, 165, 128-136.
- [8] Shang Z, Liu J, Hu Z, et al., A near-infrared fluorescence probe for the detection of bisulfite in vivo and food samples. **Dyes and Pigments** 2022, 200, 110119
- [9] Wang H, Wu X, Yang S, et al., A dual-site fluorescent probe for separate detection of hydrogen sulfide and bisulfite. **Dyes and Pigments** 2019, 160, 757-764.

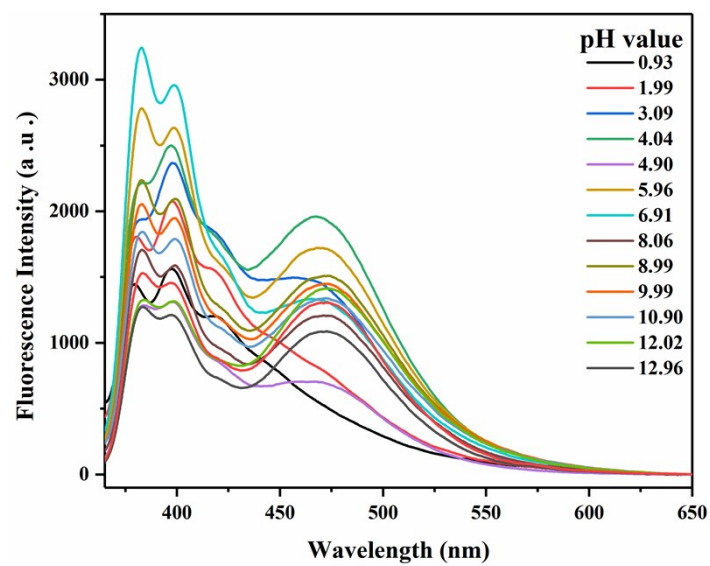

**Fig. S1** Fluorescence spectra of PYA-SBA-15 (0.05 g/L) at different pH values.

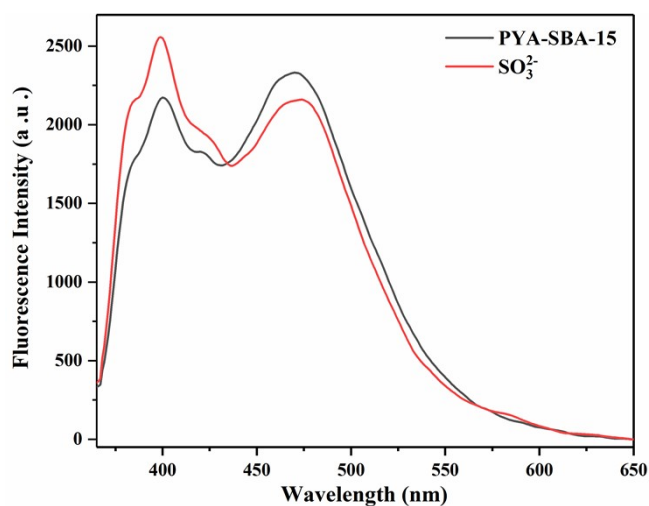

**Fig. S2** Fluorescence spectra of PYA-SBA-15 (0.05 g/L) in the absence and presence of  $\text{SO}_3^{2-}$  at pH=9.0.

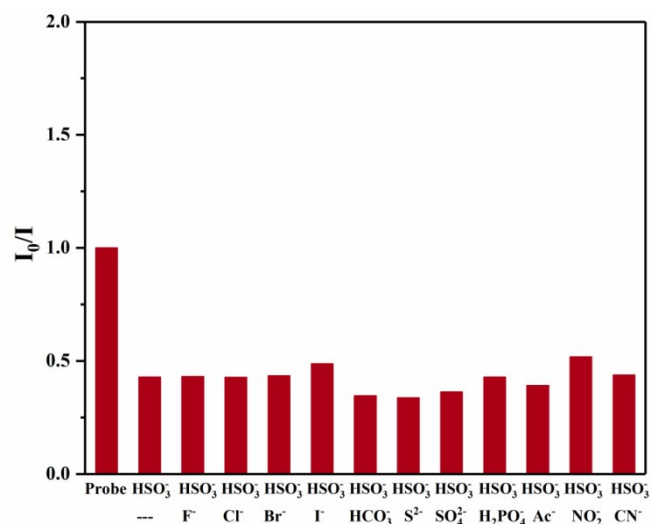

**Fig. S3** Fluorescence intensity changes ( $I_0/I$ ) of PYA-SBA-15 in the presence of  $\text{HSO}_3^-$  ( $1.0 \times 10^{-4}$  mol/L) and each of the other anions ( $3.0 \times 10^{-4}$  mol/L) in aqueous solution (20 mmol/L HEPES buffer, pH = 6.0,  $I_0$  and  $I$  represent the fluorescence intensity of PYA-SBA-15 at 398 nm in the absence and presence of anions, respectively).

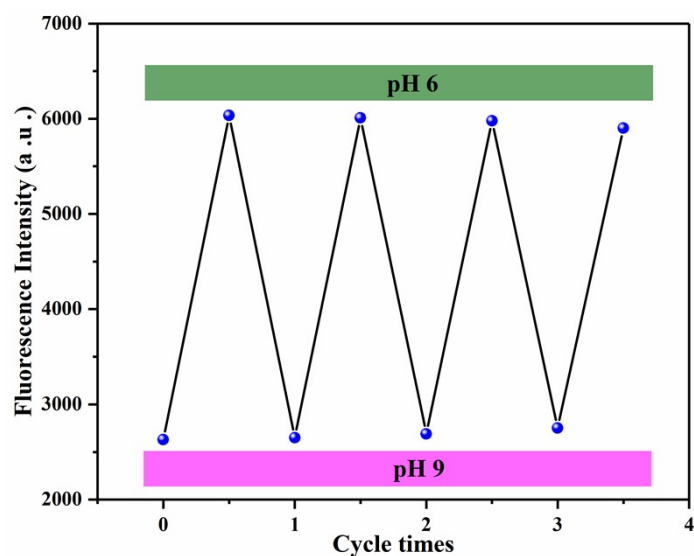

**Fig. S4** Fluorescence repeated cycles at pH 6.0 and 9.0.
